# Supplementary material for: In situ polymerized PEDOT dispersions with sulfated cellulose nanofibrils for 1D and 2D conductors
Source: Royal Society of Chemistry journal article supplement (doi:10.1039/d3ma00486d), 2023-01-01
Supplement: d3ma00486d1.pdf [file d3ma00486d1.pdf]

## Supplementary Information

### In-situ Polymerized PEDOT with Sulfated Cellulose Nanofibrils for 1D and 2D

#### Conductors

Benjamin Pingrey<sup>^</sup> and You-Lo Hsieh<sup>^#\*</sup>

<sup>^</sup>Chemical Engineering, <sup>#</sup>Biological and Agricultural Engineering

University of California at Davis, Davis, California 95616-8722, United States

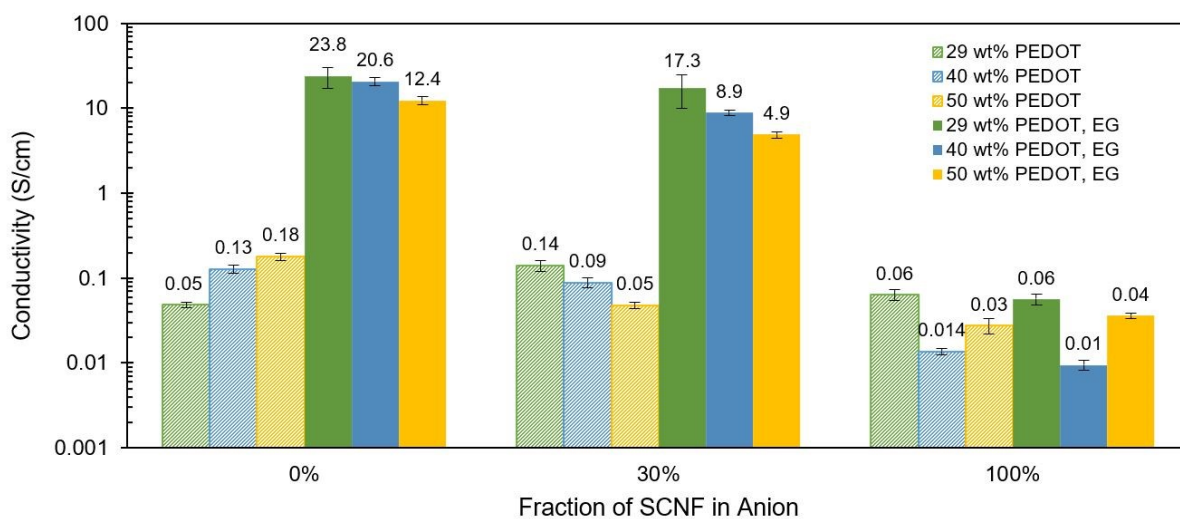

**Figure S1.** Effect of increased PEDOT fraction on cast film conductivity with and without secondary doping.

| SCNF % in polyanion | 0%                                                                                | 10%                                                                               | 30%                                                                               | 50%                                                                               | 70%                                                                                | 90%                                                                                 | 100%                                                                                |
|---------------------|-----------------------------------------------------------------------------------|-----------------------------------------------------------------------------------|-----------------------------------------------------------------------------------|-----------------------------------------------------------------------------------|------------------------------------------------------------------------------------|-------------------------------------------------------------------------------------|-------------------------------------------------------------------------------------|
| Untreated           | 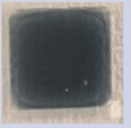 |  |  |  |  |  |  |
| EG                  |  |  |  |  |  |  |  |
| DMSO                |  |  |  |  |  |  |  |

**Figure S2.** Effect of increased SCNF fraction on conductivity of films cast from varied aqueous PEDOT:PSS/SCNF compositions with and without secondary doping.

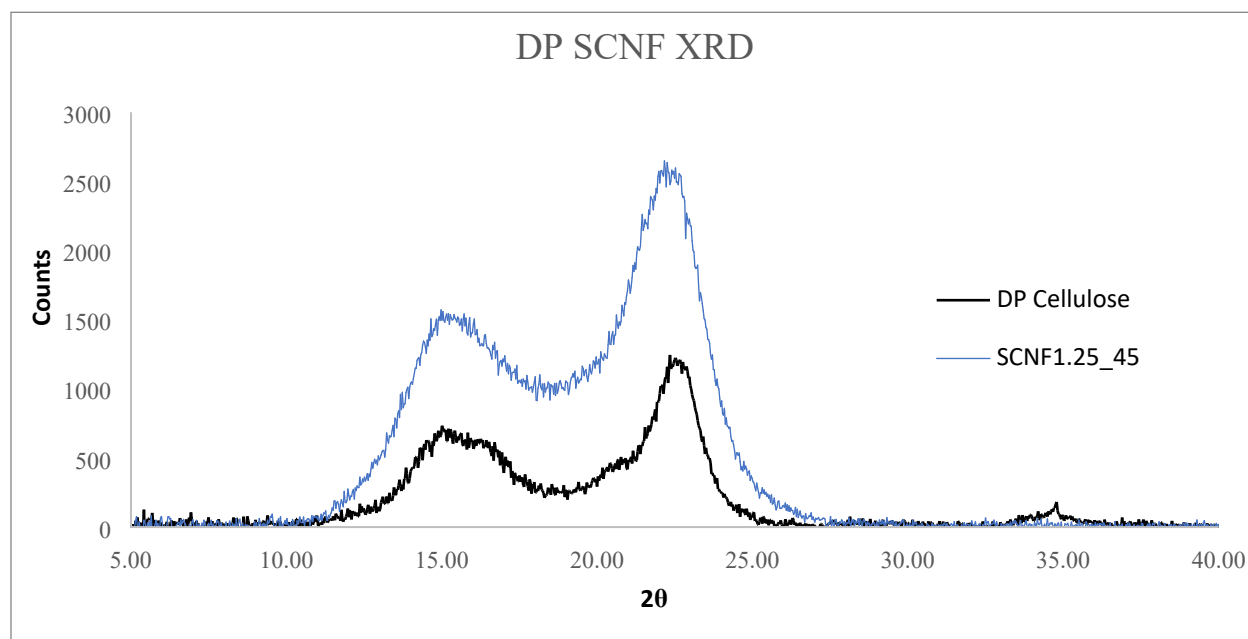

**Figure S3.** XRD of dissolving pulp cellulose and the SCNF used for complexation with PEDOT.
